# Supplementary material for: Amorphous phosphated titanium oxide with amino and hydroxyl bifunctional groups for highly efficient heavy metal removal
Source: Royal Society of Chemistry journal article supplement (doi:10.1039/c9en01466g), 2020-01-01
Supplement: c9en01466g1.pdf [file c9en01466g1.pdf]

## ***Supporting information***

### **Amorphous Phosphated Titanium Oxide with Amino and Hydroxyl Bifunctional Groups for Highly Efficient Heavy Metals Removal**

*Peng Wang,<sup>a,c,d</sup> Du Sun,<sup>a</sup> Mingxia Deng,<sup>a</sup> Shaoning Zhang,<sup>a</sup> Qingyuan Bi,<sup>a</sup> Wei Zhao,<sup>a</sup> and Fuqiang Huang<sup>\*a,b,c,d</sup>*

<sup>a</sup> State Key Laboratory of High Performance Ceramics and Superfine Microstructure, Shanghai Institute of Ceramics, Chinese Academy of Sciences, Shanghai 200050, P. R. China; E-mail: [huangfq@mail.sic.ac.cn](mailto:huangfq@mail.sic.ac.cn).

<sup>b</sup> Beijing National Laboratory for Molecular Sciences and State Key Laboratory of Rare Earth Materials Chemistry and Applications, College of Chemistry and Molecular Engineering, Peking University, Beijing 100871, P. R. China;

<sup>c</sup> Center of Materials Science and Optoelectronics Engineering, University of Chinese Academy of Sciences, Beijing 100049, P. R. China;

<sup>d</sup> School of Physical Science and Technology, ShanghaiTech University, Shanghai 200031, P. R. China.

### **Structure characterization**

X-ray diffraction (XRD) characterization of the samples was carried out on a German Bruker D8 Advance X-ray diffractometer using the Ni-filtered Cu K $\alpha$  radiation at 40 kV and 40 mA. Transmission electron microscopy (TEM) images were achieved on a JEOL-2100F TEM operated at an acceleration voltage of 200 kV. A JEM 2100F electron microscope operating at 200 kV equipped with an EDX unit (Si (Li) detector) was used for the HR-TEM investigations. Nitrogen adsorption/desorption isotherms were measured at -196°C on a Micromeritics ASAP 2460 analyzer. Samples were degassed at 200°C for 24 h prior to the measurement. Scanning electron microscopy (SEM) images were obtained by Hitachi-S4800. The functional amorphous titanium oxide materials before and after heavy metal ions adsorption were pressed into tablets with KBr powder and then detected by Fourier transform infrared spectrometer (FT-IR, Perkin Elmer, USA) with the scanning range from 400 to 4000 cm<sup>-1</sup>. TG measurements were conducted on a Netzsch STA 449C TG–DSC thermoanalyzer. The flow rate of the carrier gas (air) was 30 mL min<sup>-1</sup>. The temperature was raised from room temperature to 700 °C with a ramp rate of 10 °C min<sup>-1</sup>. The specific surface area of the samples was calculated using the Brunauer-Emmett-Teller (BET) method with the adsorption data at the relative pressure (P/P<sub>0</sub>) range of 0.05-0.2. The total pore volumes were estimated at P/P<sub>0</sub> = 0.99. The average pore diameter was analyzed with Barrett-Joyner-Halenda (BJE) method. The X-ray photoelectron spectroscopy (XPS) measurements were conducted with Thermo Scientific, ESCALAB 250Xi. The measuring spot size was 500  $\mu$ m and the binding energies were calibrated by referencing the C 1s peak (284.8 eV). The zeta potentials at various solution pH ranging from 1 to 10 were measured using Zeta sizer Nano-Z (Malvern, UK).

### **Adsorption experiments.**

Aqueous solutions containing different concentrations of heavy metal ions (0.02 - 0.5 mmol/L) have been prepared. In this case, Cd(NO<sub>3</sub>)<sub>2</sub>·4H<sub>2</sub>O, Cr(NO<sub>3</sub>)<sub>3</sub>·9H<sub>2</sub>O, Pb(NO<sub>3</sub>)<sub>2</sub>·3H<sub>2</sub>O and Fe(NO<sub>3</sub>)<sub>3</sub> were used as the source of Cd<sup>2+</sup>, Cr<sup>3+</sup>, Pb<sup>2+</sup> and Fe<sup>3+</sup> respectively. The pH of solution was adjusted by adding NaOH (0.1 M) and HNO<sub>3</sub> (0.1 M) solutions. All adsorption experiments were carried out at room temperature (25°C). The general experimental process is described as follows: 20 mg of adsorbent was added to 200 mL of Cd<sup>2+</sup>, Cr<sup>3+</sup>, Pb<sup>2+</sup> and Fe<sup>3+</sup> solution under stirring for 480 min. In this case, the pH of heavy metal ions solution was adjusted to 4.0. After a specified time, the solid and liquid were separated immediately by centrifugation with a speed of 12,000 rpm for 5 min. The concentration of heavy metal ions in the liquid analyzed by inductively coupled plasma mass

spectrometer (Thermo scientific ICAP, RQ, USA). The effect of pH on adsorption of heavy metal ions were studied by varying the pH of heavy metal ions solution from 2.0 to 7.0. In pH effect studies, the weight of adsorbent, the volume and initial concentration of heavy metal ions solutions are the same as these used in the adsorption rate tests. In this case, the contact time of adsorbent with solutions was set at 480 min.

The adsorption capacity ( $q_e$ ) for heavy metal ions was calculated according to the following equation:

$$q_e = \frac{C_0 - C_e}{m} V \quad (1)$$

$$R_e = \frac{C_0 - C_e}{C_0} \times 100\% \quad (2)$$

$$K_d = \frac{(C_0 - C_e)V}{C_e m} \quad (3)$$

where  $C_0$  and  $C_e$  represent the initial and equilibrium heavy metal ions concentrations ( $\text{ug mL}^{-1}$ ), respectively,  $K_d$  is the distribution coefficient,  $V$  is the volume of the metal ion solutions (mL), and  $m$  is the amount of adsorbent (mg).  $R_e$  (%) is the removal efficiency.

### Adsorption Kinetics

The rate of adsorption was determined by using two different rate equations. Pseudo-first-order and pseudo-second-order mechanisms were investigated for determining adsorption behaviors.

The equation for pseudo-first order kinetics is presented as follows:

$$\log(q_e - q_t) = \log q_e - \frac{k_1}{2.303} t \quad (4)$$

The equation for pseudo-second order kinetics is presented as follows:

$$\frac{t}{q_t} = \frac{1}{k_2 q_e^2} + \frac{1}{q_e} t \quad (5)$$

where  $q_t$  and  $q_e$  are the adsorption capacities of heavy metals at time  $t$  and at equilibrium time (mg/g).  $k_1$  is the rate constant of the pseudo-first order adsorption process ( $\text{min}^{-1}$ ). The values of  $k_1$  and  $q_e$  can be calculated from the slope and intercept of plots of  $\log(q_e - q_t)$  versus  $t$ . Where  $k_2$  is the rate constant of the pseudo-second order adsorption ( $\text{g} \cdot \text{mg}^{-1} \cdot \text{min}^{-1}$ ), which can be obtained by a plot of  $t/q_t$  against  $t$ .

The Elovich equation established through the work of Zeldowitsch is presented as follows:

$$Q_t = \frac{1}{\beta} \ln(\alpha\beta) + \frac{1}{\beta} \ln[\ln(t)] \quad (6)$$

where  $\alpha$  is the initial adsorption rate ( $\text{mg g}^{-1} \text{min}^{-1}$ ) and  $\beta$  is desorption rate constant ( $\text{g mg}^{-1}$ ) during any experiment. A plot of  $Q_t$  versus  $\ln(t)$  should yield a linear relationship with a slope of  $1/\beta$  and an intercept of  $(1/\beta) \ln(\alpha\beta)$ .

### **Adsorption isotherm measurement.**

For adsorption isotherm studies, 20 mg of adsorbent was added into 200 mL of heavy metal ions solution with various concentrations (0.05 - 0.5 mmol/L). The pH of heavy metal ions solution was adjusted to 4.0. The mixture was kept at room temperature under stirring for 480 min. Subsequently, the concentration of heavy metal ions was analyzed by inductively coupled plasma-optical emission spectroscopy (ICP-OES, Agilent 5110, USA). Langmuir and Freundlich adsorption models are employed to analyze experimental data.

The equation for the Langmuir isotherm is presented as follows:

$$\frac{C_e}{q_e} = \frac{1}{q_{cal}K_L} + \frac{C_e}{q_{cal}} \quad (7)$$

The equation for the the Freundlich isotherm is described as:

$$\log(q_e) = \frac{1}{n} \log(C_e) + \log K_F \quad (8)$$

where  $q_e$  is the adsorption capacity ( $\text{mg/g}$ ),  $C_e$  is the equilibrium concentration of the adsorbate ( $\text{mg/L}$ ),  $q_{cal}$  represents the maximum adsorption capacity of adsorbents ( $\text{mg/g}$ ), and  $K_L$  is the Langmuir adsorption constant ( $\text{L/mg}$ ).  $K_F$  ( $\text{mg}^{1-n} \text{L}^n \text{g}^{-1}$ ) represents the sorption capacity when the equilibrium concentration of adsorbate equals to 1, and  $n$  represents the degree of sorption dependence with equilibrium concentration. The  $q_{cal}$  and  $b$  are calculated from the slope and intercept of the linear plot of  $C_e/q_e$  against  $C_e$ . The values of  $K_F$  and  $n$  can be obtained from the intercept and the slope of the linear plot of  $\log(q_e)$  versus  $\log(C_e)$ .

### **Effect of co-existing cations, anion and HA on heavy metal ion sorption**

20 mg of adsorbent was added into 200 ml of heavy metal ions solution containing  $\text{CaCl}_2$ ,  $\text{NaF}$  and humic acid (HA) with various concentrations (10 - 50  $\text{mg/L}$ ). The pH of heavy metal ions solution was adjusted to 4.0. The mixture was kept at room temperature under stirring for 480 min.

Subsequently, by using inductively coupled plasma-optical emission spectroscopy (ICP-OES, Agilent 5110, USA) to determine the residual heavy metal ions content in the remaining solution.

### Recycle performance

To study the re-adsorption capacity of functional amorphous phosphated titanium oxide, 20 mg of adsorbent was added to 200 mL of heavy metal ions solution ( $\text{Cd}^{2+}$ ,  $\text{Cr}^{3+}$ ,  $\text{Fe}^{3+}$  and  $\text{Pb}^{2+}$  with concentrations of 0.05 mmol/L) under stirring for 480 min. In this case, the pH of solution was adjusted to 4.0. Regeneration of the used adsorbent was carried out using 1.0 M HCl. Later, the adsorbent was washed with distilled water, and dried under vacuum overnight for next adsorption experiments.

The van't Hoff equations as follows:

$$\Delta G = -RT \ln K_L \quad (9)$$

$$\ln K_F = -\frac{\Delta H^0}{RT} + \frac{\Delta S_0}{RT} \quad (10)$$

where R (8.314 J mol<sup>-1</sup> K<sup>-1</sup>) is the gas constant, T (K) is the absolute temperature.  $\Delta G^0$ ,  $\Delta H^0$  and  $\Delta S^0$  are the changes in Gibbs free energy, enthalpy and entropy, respectively.  $\Delta H^0$  and  $\Delta S^0$  were obtained from the slope and the intercept of the plot of  $\ln K_F$  vs.  $1/T$ .

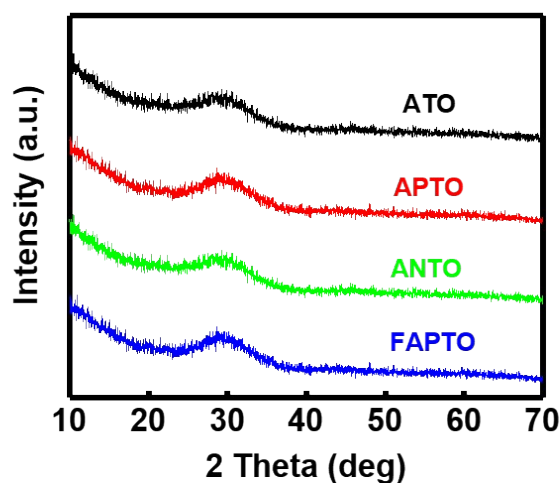

Fig. S1 XRD patterns of all samples.

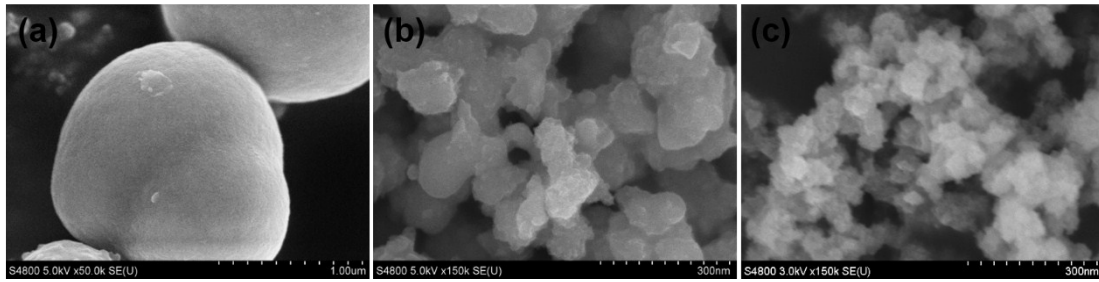

Fig. S2 SEM of (a) ATO, (b) APTO, and (c) ANTO.

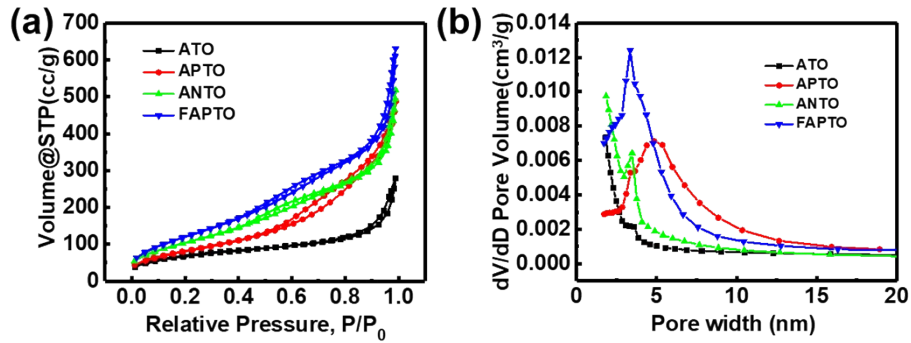

Fig. S3 (a) N<sub>2</sub> adsorption-desorption isotherms and (b) pore size distribution of all samples.

Table S1 Textural properties of samples calculated from N<sub>2</sub> adsorption isotherms.

| Samples | SSA (m <sup>2</sup> /g) | Volume (cm <sup>3</sup> /g) | Average pore size (nm) |
|---------|-------------------------|-----------------------------|------------------------|
| ATO     | 244                     | 0.37                        | 9.7                    |
| APTO    | 395                     | 0.74                        | 7.3                    |
| ANTO    | 373                     | 0.38                        | 5.3                    |
| FAPTO   | 446                     | 1.12                        | 5.6                    |

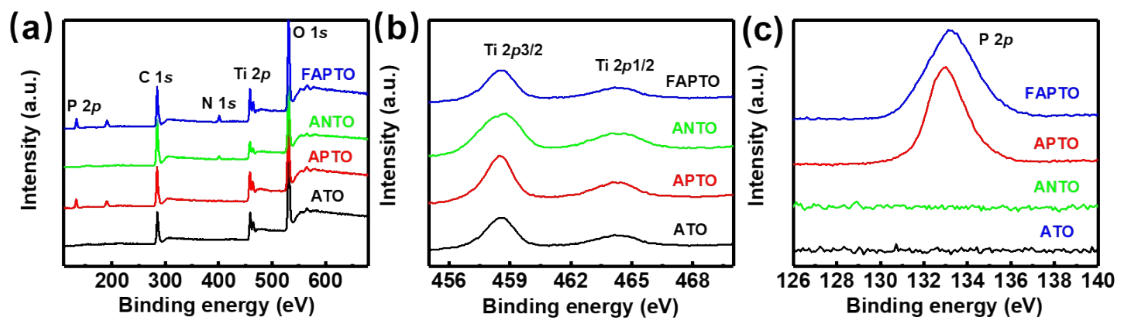

Fig. S4 (a) The full XPS spectrum; (b) High-resolution XPS spectrum of Ti 2*p*; (c) High-resolution XPS spectrum of P 2*p* of ATO, APTO, ANTO and FAPTO.

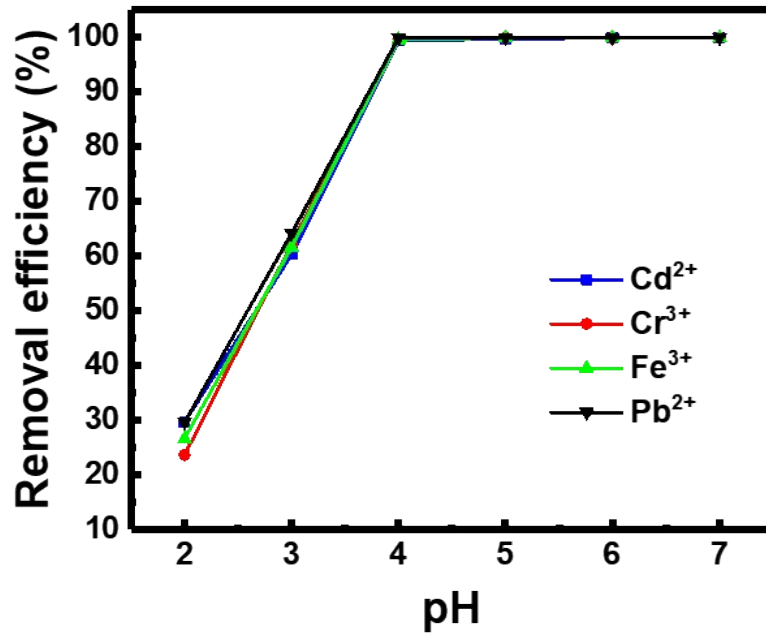

Fig. S5 Effect of solution pH on the adsorption of FAPTO.  $C_0 \sim 5$  mg/L;  $m = 0.020$  g;  $V = 200$  mL; Contact time:  $t = 480$  min.

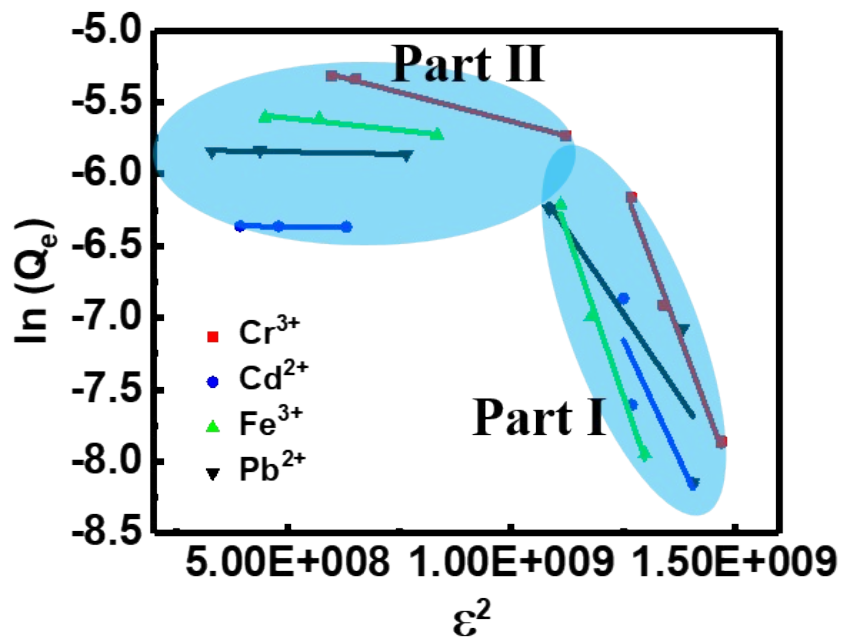

Fig. S6 A plot of  $\ln(Q_e)$  versus  $\epsilon^2$ .

**Table S2** Kinetic parameters and equations (D-R isotherm model) for adsorbing heavy metal ions onto FAPTO.

| Single ions |                  | Equations                           | E (kJ mol <sup>-1</sup> ) | R <sup>2</sup> |
|-------------|------------------|-------------------------------------|---------------------------|----------------|
| Part        | Pb <sup>2+</sup> | $Y = -1.23 - 4.58 \times 10^{-9}x$  | 10.4                      | 0.8434         |
|             | Cr <sup>3+</sup> | $Y = 4.33 - 6.32 \times 10^{-9}x$   | 8.9                       | 0.9920         |
| I           | Cd <sup>2+</sup> | $Y = 1.15 - 4.64 \times 10^{-9}x$   | 10.4                      | 0.7671         |
|             | Fe <sup>3+</sup> | $Y = 3.76 - 7.13 \times 10^{-9}x$   | 8.4                       | 0.9897         |
| Part        | Pb <sup>2+</sup> | $Y = -5.81 - 3.96 \times 10^{-11}x$ | 113                       | 0.8155         |
|             | Cr <sup>3+</sup> | $Y = -4.82 - 8.09 \times 10^{-10}x$ | 24.9                      | 0.9969         |
| I I         | Cd <sup>2+</sup> | $Y = -6.35 - 2.01 \times 10^{-11}x$ | 158                       | 0.9767         |
|             | Fe <sup>3+</sup> | $Y = -5.44 - 3.37 \times 10^{-10}x$ | 38.6                      | 0.9315         |

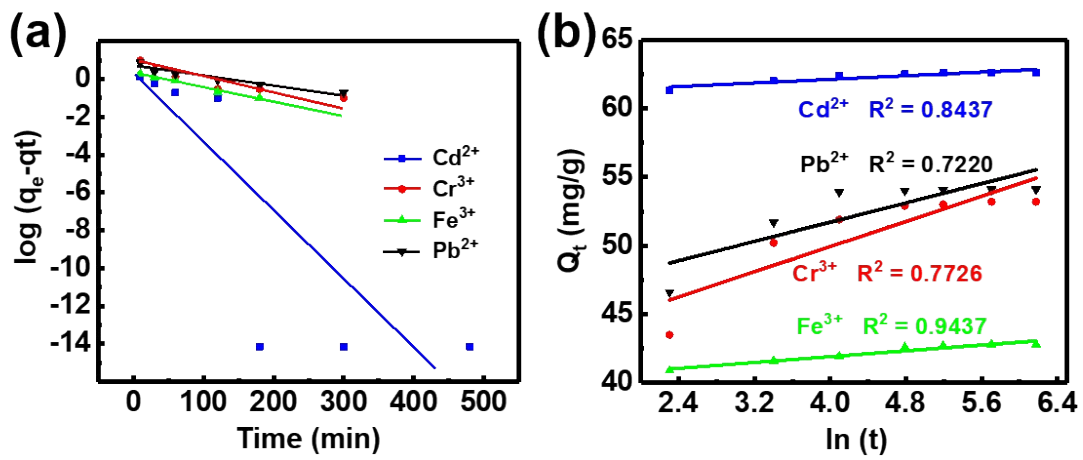

**Fig. S7.** (a) The pseudo-first order and (b) the Elovich model kinetics plot of FAPTO.

**Table S3.** Kinetic parameters (Elovich Model) for adsorbing heavy metal ions onto FAPTO.

| Single ions      | $(1/\beta)\ln(\alpha\beta)$ | $\beta$ (g mg <sup>-1</sup> ) | R <sup>2</sup> |
|------------------|-----------------------------|-------------------------------|----------------|
| Pb <sup>2+</sup> | 53.99                       | 0.57                          | 0.7220         |
| Cr <sup>3+</sup> | 53.20                       | 1.89                          | 0.7726         |
| Cd <sup>2+</sup> | 62.60                       | 3.37                          | 0.8437         |



|                  |       |      |        |
|------------------|-------|------|--------|
| Fe <sup>3+</sup> | 42.80 | 0.44 | 0.9437 |
|------------------|-------|------|--------|

**Table S4.** Kinetic parameters (Pseudo-First-Order Model) for adsorbing heavy metal ions onto FAPTO.

| Single ions      | q <sub>e,exp</sub> (mg/g) | k <sub>1</sub> | q <sub>e,cal</sub> (mg/g) | R <sup>2</sup> |
|------------------|---------------------------|----------------|---------------------------|----------------|
| Pb <sup>2+</sup> | 53.99                     | 0.0143         | 4.35                      | 0.8469         |
| Cr <sup>3+</sup> | 53.20                     | 0.0111         | 4.44                      | 0.9194         |
| Cd <sup>2+</sup> | 62.60                     | 0.0838         | 1.54                      | 0.7100         |
| Fe <sup>3+</sup> | 42.80                     | 0.0179         | 2.20                      | 0.7814         |

**Table S5.** Kinetic parameters (Pseudo-Second-Order Model) for adsorbing heavy metal ions onto FAPTO.

| Single ions      | q <sub>e,exp</sub> (mg/g) | k <sub>2</sub> | q <sub>e,cal</sub> (mg/g) | R <sup>2</sup> |
|------------------|---------------------------|----------------|---------------------------|----------------|
| Pb <sup>2+</sup> | 53.99                     | 0.0085         | 54.01                     | 0.9998         |
| Cr <sup>3+</sup> | 53.20                     | 0.0103         | 53.42                     | 0.9999         |
| Cd <sup>2+</sup> | 62.60                     | 0.0699         | 62.66                     | 0.9999         |
| Fe <sup>3+</sup> | 42.80                     | 0.0267         | 42.88                     | 0.9999         |

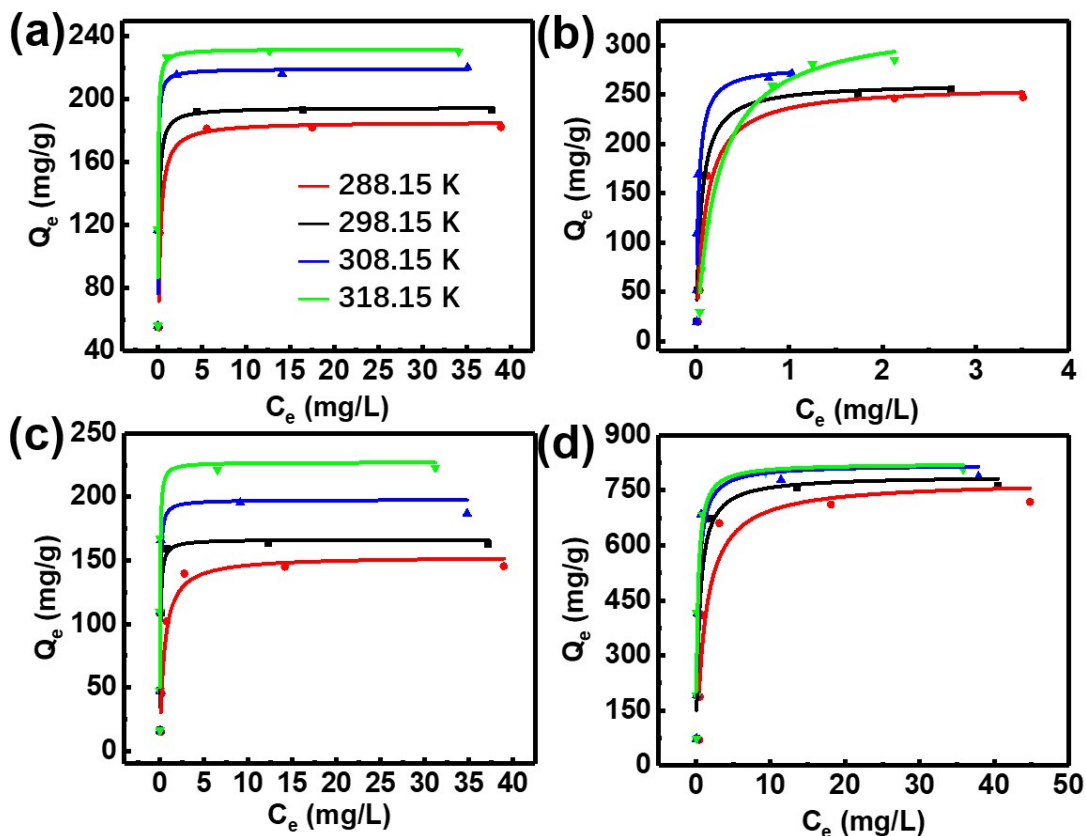

Fig. S8. The Langmuir equilibrium isotherm of (a)  $\text{Cd}^{2+}$ ; (b)  $\text{Cr}^{3+}$ ; (c)  $\text{Fe}^{3+}$  and (d)  $\text{Pb}^{2+}$  onto FAPTO at different temperature. ( $C_0(\text{Cd}^{2+}) = 6.3 - 57.1 \text{ mg/L}$ ;  $C_0(\text{Cr}^{3+}) = 5.3 - 28.2 \text{ mg/L}$ ;  $C_0(\text{Fe}^{3+}) = 4.3 - 54.4 \text{ mg/L}$ ;  $C_0(\text{Pb}^{2+}) = 5.4 - 116.3 \text{ mg/L}$ ;  $m = 0.020 \text{ g}$ ;  $V = 200 \text{ mL}$ ;  $t = 480 \text{ min}$ ;  $T = 298.15 \text{ K}$ ;  $m = 0.020 \text{ g}$ ;  $V = 200 \text{ mL}$ ; Contact time:  $t = 480 \text{ min}$ .)

Table S6. Parameters of the Langmuir and Freundlich Isotherm for Heavy Metal Ions Adsorption onto FAPTO at different temperature.

| T (K)  | Single ions      | Langmuir model          |              |        | Freundlich model                               |     |        |
|--------|------------------|-------------------------|--------------|--------|------------------------------------------------|-----|--------|
|        |                  | $q_{\text{cal}}$ (mg/g) | $K_L$ (L/mg) | $R^2$  | $K_F$ ( $\text{mg}^{1-n}\text{L}^n/\text{g}$ ) | $n$ | $R^2$  |
| 288.15 | $\text{Pb}^{2+}$ | 775.2                   | 1.86         | 0.9039 | 337.81                                         | 4   | 0.6982 |
|        | $\text{Cr}^{3+}$ | 259.4                   | 10.20        | 0.9593 | 191.74                                         | 3   | 0.8394 |
|        | $\text{Cd}^{2+}$ | 185.7                   | 5.25         | 0.9588 | 120.40                                         | 7   | 0.7964 |
|        | $\text{Fe}^{3+}$ | 153.1                   | 8.07         | 0.9734 | 83.18                                          | 5   | 0.7204 |
| 298.15 | $\text{Pb}^{2+}$ | 788.4                   | 2.14         | 0.9687 | 415.59                                         | 5   | 0.7456 |
|        | $\text{Cr}^{3+}$ | 261.7                   | 19.35        | 0.9802 | 211.79                                         | 4   | 0.8523 |

|        |                  |       |       |        |        |   |        |
|--------|------------------|-------|-------|--------|--------|---|--------|
|        | Cd <sup>2+</sup> | 194.5 | 11.86 | 0.9879 | 133.74 | 8 | 0.7913 |
|        | Fe <sup>3+</sup> | 166.4 | 17.46 | 0.9798 | 113.75 | 8 | 0.7456 |
| 308.15 | Pb <sup>2+</sup> | 819.9 | 3.69  | 0.9219 | 458.23 | 6 | 0.6883 |
|        | Cr <sup>3+</sup> | 279.3 | 39.90 | 0.9724 | 278.22 | 4 | 0.8142 |
|        | Cd <sup>2+</sup> | 219.4 | 26.66 | 0.9642 | 157.22 | 8 | 0.8082 |
|        | Fe <sup>3+</sup> | 197.6 | 26.87 | 0.8694 | 132.05 | 8 | 0.6163 |
| 318.15 | Pb <sup>2+</sup> | 823.3 | 4.66  | 0.9343 | 477.40 | 6 | 0.7349 |
|        | Cr <sup>3+</sup> | 324.2 | 45.01 | 0.9917 | 239.80 | 3 | 0.9260 |
|        | Cd <sup>2+</sup> | 232.0 | 29.92 | 0.9286 | 169.44 | 8 | 0.7495 |
|        | Fe <sup>3+</sup> | 227.2 | 35.65 | 0.8888 | 150.74 | 7 | 0.6958 |

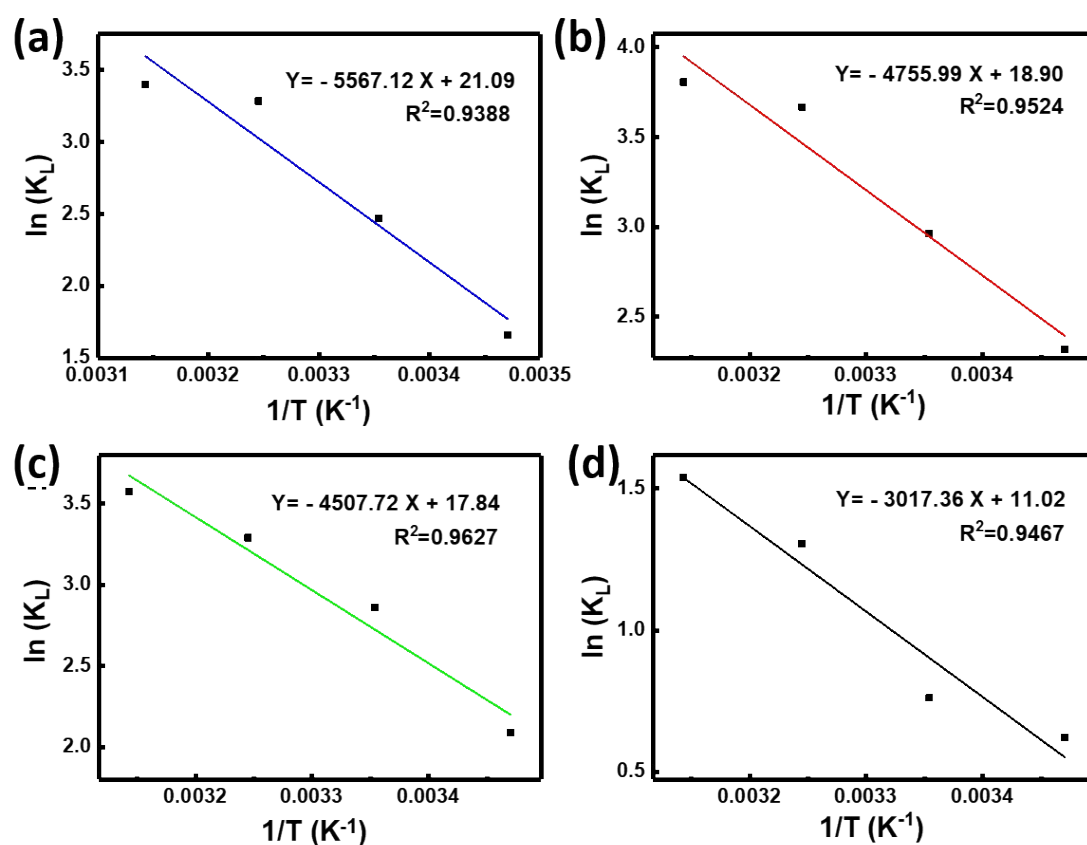

Fig. S9 Van't Hoff plots for the adsorption of (a) Cd<sup>2+</sup>; (b) Cr<sup>3+</sup>; (c) Fe<sup>3+</sup> and (d) Pb<sup>2+</sup> onto FAPTO.

Table S7. Thermodynamic Parameters of heavy metal ions Adsorption on FAPTO.

| T (K) | Single ions | $\Delta G^0$ (kJ mol <sup>-1</sup> ) | $\Delta H^0$ (kJ mol <sup>-1</sup> ) | $\Delta S^0$ (J mol <sup>-1</sup> K <sup>-1</sup> ) |
|-------|-------------|--------------------------------------|--------------------------------------|-----------------------------------------------------|
|-------|-------------|--------------------------------------|--------------------------------------|-----------------------------------------------------|

---

|        |                  |        |       |        |
|--------|------------------|--------|-------|--------|
| 288.15 | Cd <sup>2+</sup> | -3.97  | 46.28 | 175.34 |
| 289.15 |                  | -6.13  |       |        |
| 308.15 |                  | -8.41  |       |        |
| 318.15 |                  | -8.99  |       |        |
| 288.15 | Cr <sup>3+</sup> | -5.56  | 39.54 | 157.13 |
| 289.15 |                  | -7.34  |       |        |
| 308.15 |                  | -9.40  |       |        |
| 318.15 |                  | -10.07 |       |        |
| 288.15 | Fe <sup>3+</sup> | -5.00  | 37.48 | 148.32 |
| 289.15 |                  | -7.09  |       |        |
| 308.15 |                  | -8.43  |       |        |
| 318.15 |                  | -9.45  |       |        |
| 288.15 | Pb <sup>2+</sup> | -1.49  | 25.09 | 91.62  |
| 289.15 |                  | -1.89  |       |        |
| 308.15 |                  | -3.34  |       |        |
| 318.15 |                  | -4.07  |       |        |

---

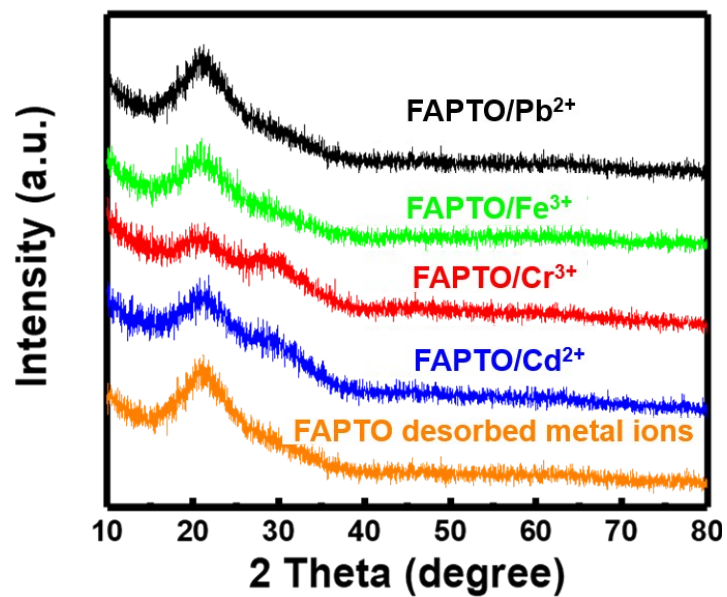

**Fig. S10** The XRD patterns of FAPTO-10 after  $\text{Cd}^{2+}$ ,  $\text{Cr}^{3+}$ ,  $\text{Fe}^{3+}$  and  $\text{Pb}^{2+}$  adsorption.
